# Supplementary material
Source: PubMed Central journal article supplement (PMC2643572)
Supplement: supp_75_4_1036__1.pdf [file supp_75_4_1036__1.pdf]

**Supplementary table S1. Taxonomic details of *Wolbachia* hosts and accession numbers of analyzed sequences.**

| Taxon                 | Order                    | Species                           | Strain   | GenBank accession number <sup>b</sup> |                 |                 |                 | Supergroup     |
|-----------------------|--------------------------|-----------------------------------|----------|---------------------------------------|-----------------|-----------------|-----------------|----------------|
|                       |                          |                                   |          | 16S rDNA                              | <i>gltA</i>     | <i>groEL</i>    | <i>ftsZ</i>     |                |
| Phylum Arthropoda     |                          |                                   |          |                                       |                 |                 |                 |                |
| Subphylum Chelicerata |                          |                                   |          |                                       |                 |                 |                 |                |
| Class Arachnida       |                          |                                   |          |                                       |                 |                 |                 |                |
|                       | Araneae                  | <i>Diaea</i> spec.                | wDiaspp1 | AY486069                              | -               | -               | -               | ? <sup>a</sup> |
|                       |                          | <i>Diaea</i> spec.                | wDiaspp2 | AY486070                              | -               | -               | -               | ? <sup>a</sup> |
|                       |                          | <i>Diaea circumlita</i>           | wDiacir1 | AY486071                              | -               | -               | -               | ? <sup>a</sup> |
|                       |                          | <i>Diaea circumlita</i>           | wDiacir2 | AY486072                              | -               | -               | -               | ? <sup>a</sup> |
|                       |                          | <i>Diaea circumlita</i>           | wDiacir3 | AY486073                              | -               | -               | -               | ? <sup>a</sup> |
|                       | Prostigmata<br>(Acarina) | <i>Bryobia praetiosa</i>          | NL12     | <b>EU499317</b>                       | <b>EU499327</b> | <b>EU499332</b> | <b>EU499322</b> | B              |
|                       |                          | <i>Bryobia sarothamni</i>         | FR16     | <b>EU499315</b>                       | <b>EU499325</b> | <b>EU499330</b> | <b>EU499320</b> | B              |
|                       |                          | <i>Bryobia</i> spec. I            | NL14     | <b>EU499318</b>                       | <b>EU499328</b> | <b>EU499333</b> | <b>EU499323</b> | B              |
|                       |                          | <i>Bryobia</i> spec. V            | ITA11    | <b>EU499316</b>                       | <b>EU499326</b> | <b>EU499331</b> | <b>EU499321</b> | K              |
|                       |                          | <i>Tetranychus urticae</i>        | T2       | <b>EU499319</b>                       | <b>EU499329</b> | <b>EU499334</b> | <b>EU499324</b> | B              |
| Subphylum Hexapoda    |                          |                                   |          |                                       |                 |                 |                 |                |
| Class Entognatha      |                          |                                   |          |                                       |                 |                 |                 |                |
|                       | Collembola               | <i>Folsomia candida</i>           |          | AF179630                              | AJ609649        | -               | AJ344216        | E              |
|                       |                          | <i>Mesaphorura macrochaeta</i>    |          | AJ422184                              | -               | -               | -               | E              |
| Class Insecta         |                          |                                   |          |                                       |                 |                 |                 |                |
|                       | Blattodea                | <i>Blatella</i> spec.             |          | DQ354919                              | -               | -               | -               | F              |
|                       |                          | <i>Supella longipalpa</i>         |          | DQ354920                              | -               | -               | -               | F              |
|                       | Coleoptera               | <i>Rhinocyllus conicus</i>        |          | M85267                                | -               | -               | -               | F              |
|                       |                          | <i>Tribolium confusum</i>         |          | X62247                                | AY714784        | AY714798        | U28194          | B              |
|                       | Diptera                  | <i>Culex quinquefasciatus</i>     |          | AF397409                              | AY714789        | AY714804        | -               | B              |
|                       |                          | <i>Drosophila melanogaster</i>    | wMel     | AE017196                              | AE017196        | AE017196        | U28189          | A              |
|                       |                          | <i>Drosophila simulans</i>        | wMa      | AF390864                              | AY714786        | AY714799        | AY508999        | B              |
|                       |                          | <i>Drosophila simulans</i>        | wRi      | DQ412085                              | AY714791        | AY714806        | U28178          | A              |
|                       | Hymenoptera              | <i>Encarsia formosa</i>           |          | AF045189                              | AY714783        | AY714797        | U28196          | B              |
|                       |                          | <i>Nasonia giraulti</i>           |          | M84690                                | AY714793        | AY714810        | U28182          | A              |
|                       |                          | <i>Nasonia longicornis</i>        |          | M84691                                | AY714794        | AY714811        | -               | A              |
|                       |                          | <i>Nasonia vitripennis</i>        |          | M84688                                | AY714795        | AY714812        | U28188          | A              |
|                       |                          | <i>Nasonia vitripennis</i>        |          | M84686                                | AY714782        | AY714796        | U28205          | B              |
|                       |                          | <i>Protocalliphora sialis</i>     |          | -                                     | AY714788        | AY714801        | U28202          | B              |
|                       | Isoptera                 | <i>Kaloterms flavicollis</i>      |          | Y11377                                | AJ609651        | AJ609660        | AJ292345        | F              |
|                       |                          | <i>Microcerotermes</i> spec.      |          | AJ292347                              | -               | AJ628411        | AJ292346        | F              |
|                       |                          | <i>Zootermopsis angusticollis</i> |          | AY764279                              | AY764281        | AY764278        | AY764283        | H              |
|                       |                          | <i>Zootermopsis nevadensis</i>    |          | AY764280                              | AY764282        | AY764277        | AY764284        | H              |
|                       | Neuroptera               | <i>Myrmeleon mobilis</i>          | OTU1     | DQ068882                              | -               | -               | -               | F              |
|                       |                          | <i>Myrmeleon mobilis</i>          | OTU2     | DQ068788                              | -               | -               | -               | ? <sup>a</sup> |
|                       | Siphonaptera             | <i>Ctenocephalides felis</i>      |          | AY335923                              | AJ609650        | AJ609659        | AJ628415        | I              |
|                       |                          | <i>Orchopeas leucopus</i>         |          | AY335924                              | -               | -               | -               | I              |
| Phylum Nematoda       |                          |                                   |          |                                       |                 |                 |                 |                |
| Class Secernentea     |                          |                                   |          |                                       |                 |                 |                 |                |
| Spirurida             |                          |                                   |          |                                       |                 |                 |                 |                |
|                       |                          | <i>Brugia malayi</i>              |          | AF051145                              | AJ609643        | AF373870        | AJ010269        | D              |
|                       |                          | <i>Brugia pahangi</i>             |          | AJ012646                              | AJ609642        | AJ609654        | AJ010270        | D              |
|                       |                          | <i>Dipetalonema gracile</i>       |          | AJ548802                              | AJ609648        | AJ609658        | -               | J              |
|                       |                          | <i>Dirofilaria immitis</i>        |          | Z49261                                | AJ609641        | AJ558023        | AJ010272        | C              |
|                       |                          | <i>Dirofilaria repens</i>         |          | AJ276500                              | -               | AJ609653        | AJ010273        | C              |
|                       |                          | <i>Litomosoides brasiliensis</i>  |          | AJ548799                              | AJ609646        | AJ609655        | -               | D              |
|                       |                          | <i>Litomosoides sigmodontis</i>   |          | AF069068                              | AJ609645        | AF409113        | AJ010271        | D              |
|                       |                          | <i>Mansonella ozzardi</i>         |          | AJ279034                              | AJ609647        | AJ609657        | -               | F              |
|                       |                          | <i>Mansonella</i> spec.           |          | -                                     | AJ628413        | AJ628412        | AJ628414        | F              |
|                       |                          | <i>Onchocerca gibsoni</i>         |          | AJ276499                              | AJ609639        | AJ609652        | AJ010267        | C              |
|                       |                          | <i>Onchocerca ochengi</i>         |          | AJ010276                              | AJ609640        | -               | AJ010266        | C              |
|                       |                          | <i>Onchocerca volvulus</i>        |          | AF069069                              | -               | Y09416          | AJ276501        | C              |
|                       |                          | <i>Wuchereria bancrofti</i>       |          | AF093510                              | AJ609644        | -               | AF081198        | D              |

<sup>a</sup> supergroup assignment unclear

<sup>b</sup> sequences obtained in this study are depicted in bold
